# Supplementary material for: Effect of Pneumococcal Conjugate Vaccine on Pneumococcal Meningitis
Source: Atypon-hosted journal article supplement (doi:10.1056/nejmoa0800836), 2009-01-14

## Supplementary Appendix

This appendix has been provided by the authors to give readers additional information about their work.

Supplement to: Hsu HE, Shutt KA, Moore MR, et al. Effect of pneumococcal conjugate vaccine on pneumococcal meningitis. *N Engl J Med* 2009;360:244-56.

## **SUPPLEMENTAL APPENDIX**

I. Minimal Inhibitory Concentration (MIC) Breakpoints

II. List of Underlying Conditions

III. Appendix Table 1. Proportion of pneumococcal isolates nonsusceptible to antibiotics, by serotype, 1998-2005 (n=1,239).

IV. Appendix Figure 1. Percentage of pneumococcal isolates that were nonsusceptible to various antibiotics by serotype groups and time period (n=1,239).

## **I. Minimal Inhibitory Concentration (MIC) Breakpoints**

Susceptible, intermediate, and resistant MIC breakpoints were, respectively,  $\leq 0.06$ , 0.12-1, and  $\geq 2$   $\mu\text{g/mL}$  for penicillin,  $\leq 0.25$ , 0.50, and  $\geq 1$   $\mu\text{g/mL}$  for meropenem,  $\leq 1$ , 2 and  $\geq 4$   $\mu\text{g/mL}$  for rifampin,  $\leq 2$ , 4 and  $\geq 8$   $\mu\text{g/mL}$  for levofloxacin, and  $\leq 0.50$ , 1, and  $\geq 2$   $\mu\text{g/mL}$  for cefotaxime. Breakpoints for chloramphenicol were  $\leq 4$   $\mu\text{g/mL}$  for susceptible and  $\geq 8$   $\mu\text{g/mL}$  for resistant. For vancomycin, isolates were classified as susceptible at  $\leq 1$   $\mu\text{g/mL}$ .

## **II. List of Underlying Conditions**

For analyses of trends in the proportion of patients with underlying conditions, the following conditions were included: alcoholism, atherosclerotic cardiovascular disease, asplenia, cirrhosis, chronic obstructive pulmonary disease, cerebrospinal fluid leak, diabetes mellitus, renal failure/dialysis, immunoglobulin deficiency, heart failure, human immunodeficiency virus, systemic lupus erythematosus, nephrotic syndrome, organ transplantation, sickle cell disease, immunosuppressive therapy, Hodgkin's disease, multiple myeloma, leukemia, and other malignancy. The following conditions were excluded from these analyses because they were not collected by ABCs during the baseline period of 1998-1999: smoker, complement deficiency, cochlear implant, and cerebrovascular accident.

**III. Appendix Table 1. Proportion of pneumococcal isolates nonsusceptible to antibiotics, by serotype, 1998-2005 (n=1,239).**

| Serotype                   | Number<br>isolates† | % Nonsusceptible* |                 |           |            |
|----------------------------|---------------------|-------------------|-----------------|-----------|------------|
|                            |                     | Penicillin        | Chloramphenicol | Meropenem | Cefotaxime |
| All serotypes              | 1239                | 28                | 6               | 17        | 12         |
| All PCV7 serotypes         | 547                 | 41                | 8               | 28        | 20         |
| 4                          | 79                  | 1                 | 1               | 0         | 0          |
| 6B                         | 81                  | 48                | 20              | 20        | 17         |
| 9V                         | 42                  | 64                | 0               | 57        | 40         |
| 14                         | 91                  | 65                | 2               | 49        | 26         |
| 18C                        | 64                  | 3                 | 0               | 0         | 0          |
| 19F                        | 93                  | 46                | 10              | 34        | 25         |
| 23F                        | 97                  | 54                | 19              | 37        | 34         |
| All PCV7-related serotypes | 175                 | 33                | 2               | 15        | 9          |
| 6A                         | 101                 | 41                | 1               | 19        | 10         |
| 9A                         | 7                   | 71                | 0               | 71        | 71         |
| 9N                         | 21                  | 5                 | 0               | 0         | 0          |
| 18B                        | 6                   | 0                 | 0               | 0         | 0          |
| 18F                        | 5                   | 0                 | 0               | 0         | 0          |
| 19C                        | 1                   | 100               | 100             | 100       | 100        |
| 23A                        | 24                  | 42                | 4               | 4         | 0          |

**Appendix Table 1, continued.**

| Serotype               | Number<br>isolates† | % Nonsusceptible* |                 |           |            |
|------------------------|---------------------|-------------------|-----------------|-----------|------------|
|                        |                     | Penicillin        | Chloramphenicol | Meropenem | Cefotaxime |
| All non-PCV7 serotypes | 517                 | 12                | 4               | 5         | 4          |
| 3                      | 70                  | 0                 | 7               | 0         | 1          |
| 10A                    | 22                  | 0                 | 0               | 0         | 0          |
| 11A                    | 34                  | 0                 | 0               | 0         | 0          |
| 12F                    | 37                  | 0                 | 8               | 0         | 0          |
| 15A                    | 16                  | 63                | 44              | 0         | 0          |
| 15B/C                  | 56                  | 4                 | 2               | 0         | 0          |
| 19A                    | 56                  | 61                | 7               | 21        | 20         |
| 21                     | 2                   | 50                | 0               | 0         | 0          |
| 22F                    | 59                  | 2                 | 2               | 0         | 0          |
| 33F                    | 17                  | 0                 | 0               | 0         | 0          |
| 35B                    | 23                  | 70                | 0               | 65        | 30         |
| 35F                    | 16                  | 0                 | 0               | 0         | 0          |

Note: PCV7, heptavalent pneumococcal conjugate vaccine

\*Additionally there was one isolate each of serotypes 4, 9V and 23F non-susceptible to levofloxacin and one isolate each of serotypes 6A, 9V, 14, 15B/C, 22F, 7F and 18F non-susceptible to rifampin. All tested isolates were susceptible to vancomycin.

†136 isolates missing antibiotic susceptibility data for penicillin, meropenem, and cefotaxime and 137 isolates missing chloramphenicol susceptibility data and 4 isolates with unknown serotype were excluded.

**IV. Appendix Figure 1.** Percentage of pneumococcal isolates that were nonsusceptible to various antibiotics by serotype groups and time period (n=1,239).

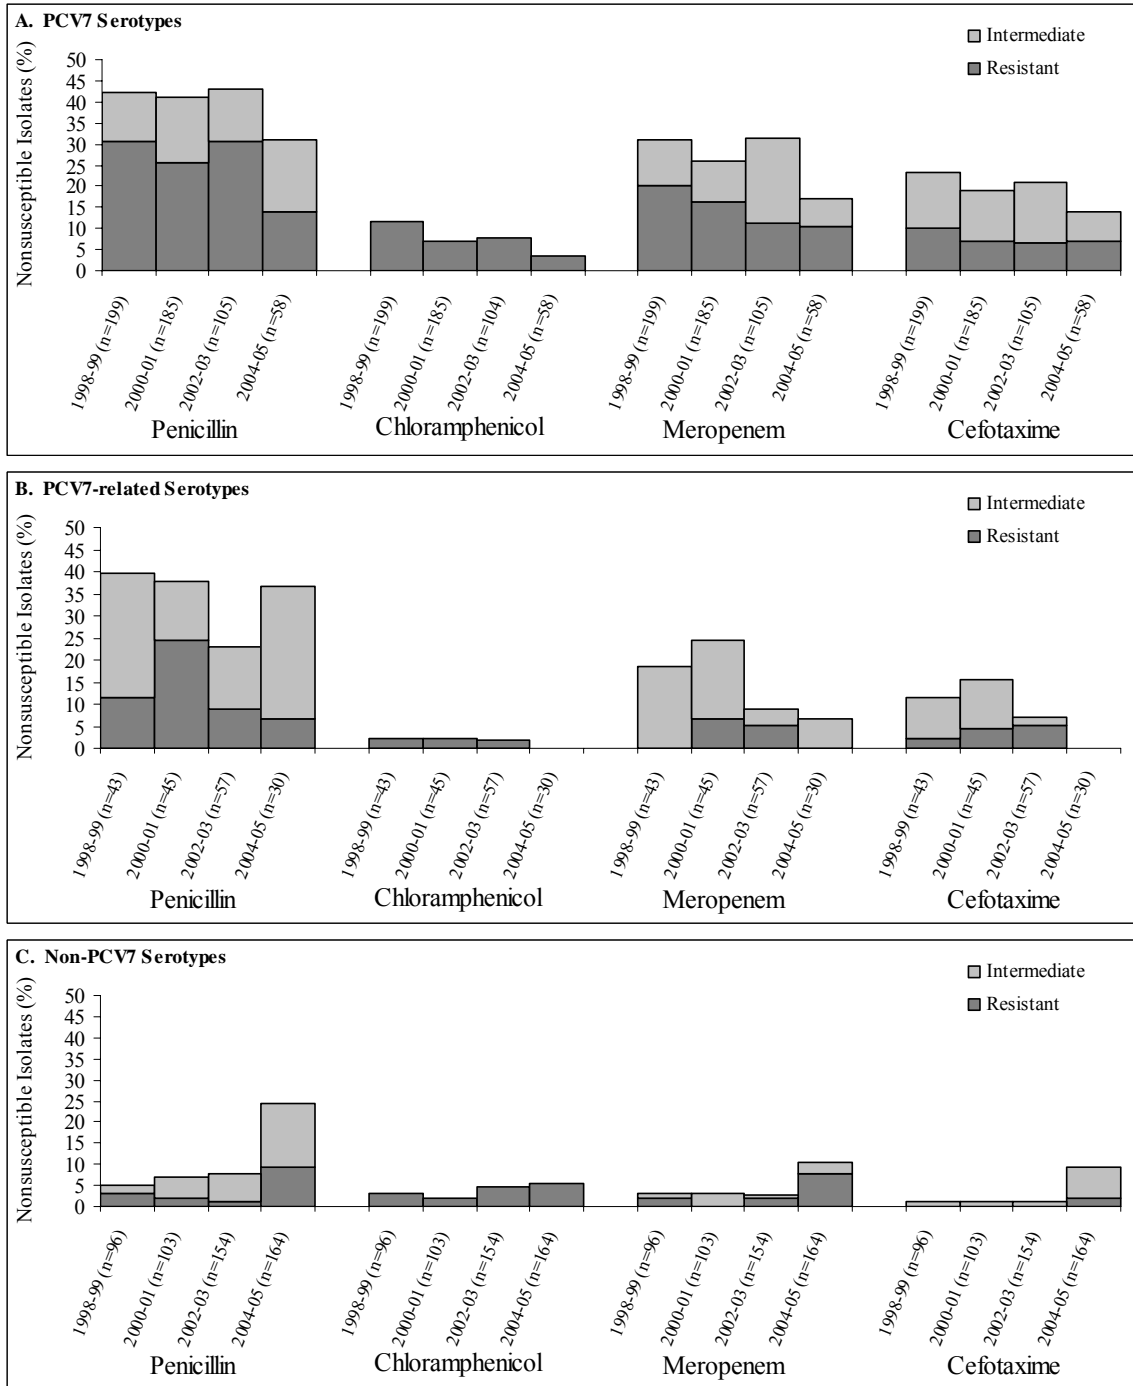

Supplement: nejm_hsu_244sa1.pdf [file nejm_hsu_244sa1.pdf]
